# Supplementary material
Source: PubMed Central journal article supplement (PMC3997597)
Supplement: NIHMS554594-supplement-01.pdf [file NIHMS554594-supplement-01.pdf]

## Figure Legends

**Supplemental Fig. 1 Magenta-Green Version of Figure 1: Subcellular distribution and characterization of immunostaining levels.** Representative double immune-stained images of neuronal cultures using anti-calbindin (**A**) and anti- $\beta$ -tubulin (**B**) antibodies. **C**, merged image. Note that calbindin staining was heterogeneous while  $\beta$ -tubulin staining level was relatively uniform in all cells. Arrow, a neuron stained with anti-calbindin antibody showed brighter spots in the nuclei, suggesting differential staining levels within different sub-cellular compartments. Three cells with high, intermediate and low levels were circled with dashed line, and the normalized calbindin staining irradiance values was indicated on top of each cell in **A**.

**Supplemental Fig. 2 Magenta-Green version of Figure 3: Distribution patterns of calretinin and calbindin in P6 mouse cochlea.** Two cochlear sections in close proximity were stained with anti-calretinin (**A-E**) and anti-calbindin antibodies (**F-J**) respectively. Both anti-calretinin and anti-calbindin antibody staining showed heterogeneous patterns in the spiral ganglion. HC, hair cell. SGN, spiral ganglion. SL, spiral limbus. **A**, Low magnification image of cochlear sections double labeled with anti- $\beta$ -tubulin (magenta) and anti-calretinin (green) antibodies **B-E**, High magnification images of middle (**B-C**) and basal (**D-E**) neuronal regions enclosed by dotted line in **A**. **F**, low magnification image of a cochlear section showing double labeling of anti-calbindin (green) and anti- $\beta$ -tubulin (magenta) antibodies. Prominent calbindin staining was also observed in the spiral limbus **G-J**, High magnification image of the middle (**G, H**) and basal (**I, J**) regions as squared in **F**. Scale bar in **F** applies to **A, F**. Scale bar in **J** applied to **B-E, G-J**.

**Supplemental Fig. 3 Magenta-Green version of Figure 4: Calretinin and calbindin exhibited differential distribution patterns in murine spiral ganglion.** **A-C**, The mid-cochlear region of a whole-mount preparation of P7 mouse spiral ganglion labeled with mouse anti-calretinin (**A**) and rabbit anti-calbindin (**B**) antibodies. **C**, The merged image of **A** and **B**. Most cells were labeled by mainly calretinin (triangle), mainly calbindin (arrowhead), or a low level of both (arrow). Only a few neurons possessed a high level of both staining (asterisk). Scale bar in **C** (20 $\mu$ m) applies to **A-C**. **D**, Superimposed image of *in vitro* culture shows heterogeneous distribution pattern of calretinin and calbindin that range from mainly calretinin-staining cells (magenta) to mainly calbindin staining cells (green) similar to **A-C**. Example cells were labeled according to the four categories in **G**. Frequency histograms of normalized calretinin staining irradiance (**E**) and normalized calbindin staining irradiance (**F**) were constructed from measurements of the same single experiment as shown in **D** (total number of measurements = 320). Both histograms were composed of multiple populations with distinct staining irradiance levels which could be fit by the sum of three Gaussians with discrete means. The vertical dashed lines (**E** and **F**, respectively) delineate the mid points between high and medium means of Gaussian fits of normalized calretinin (0.32) and normalized calbindin (0.19) staining irradiance used in **G** inset. **G**, scatter plot of normalized calretinin and calbindin staining measurements in each neuron. **Inset**, Cells were divided into four categories to highlight relative irradiance patterns based on both x and y cutoffs (dotted lines in **E-F**).

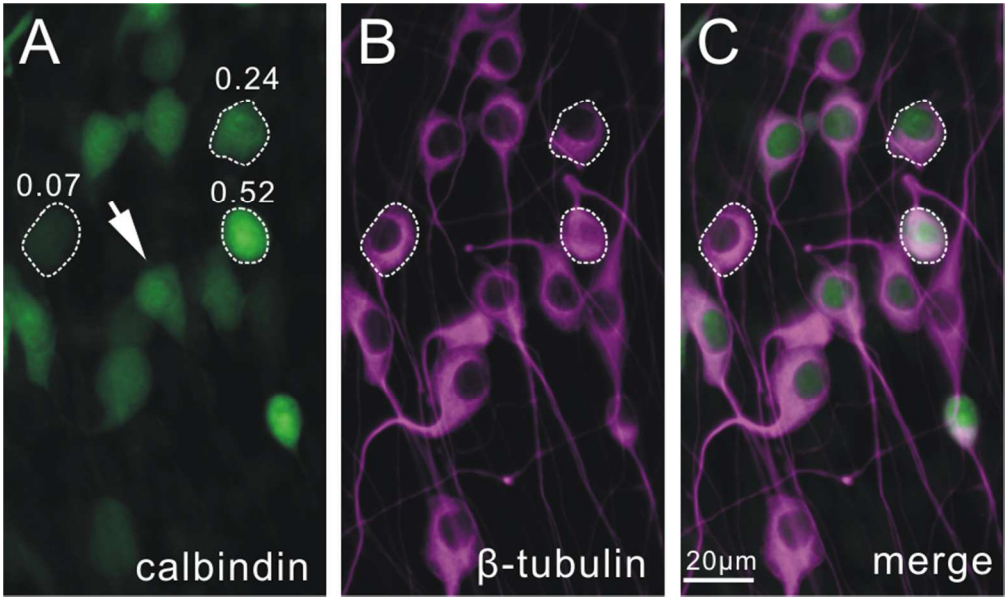

Supp. Fig. 1 Magenta-Green Version of Figure 1

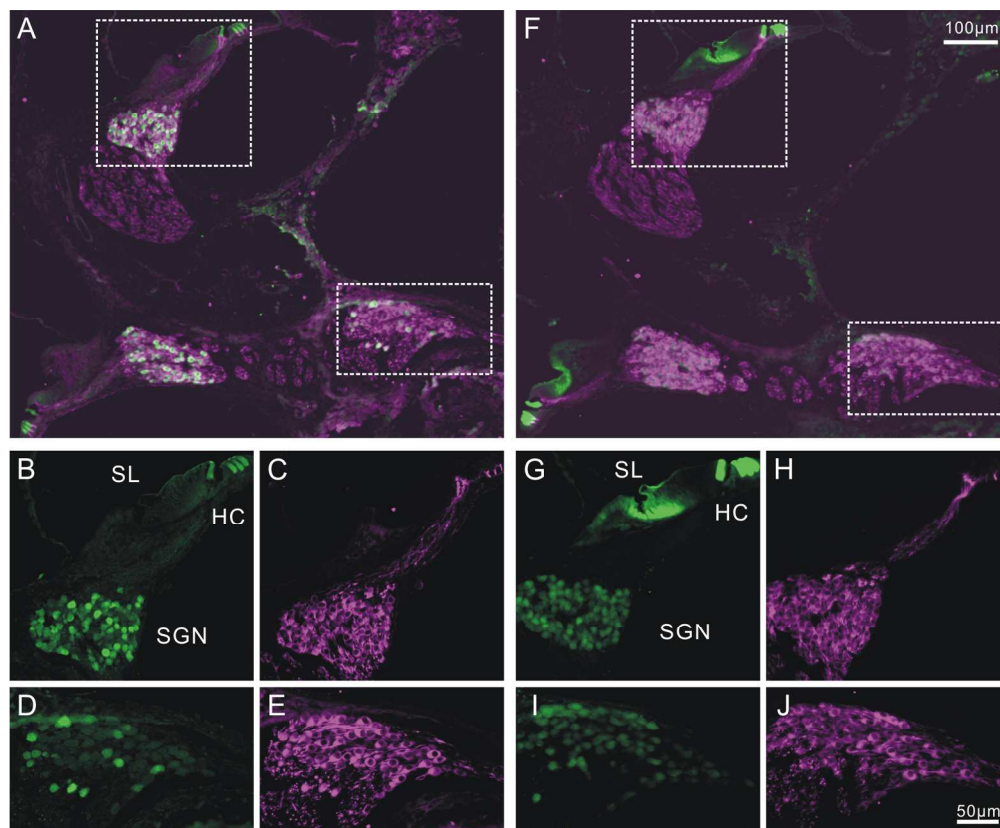

Supp. Fig. 2 Magenta-Green version of Figure 3

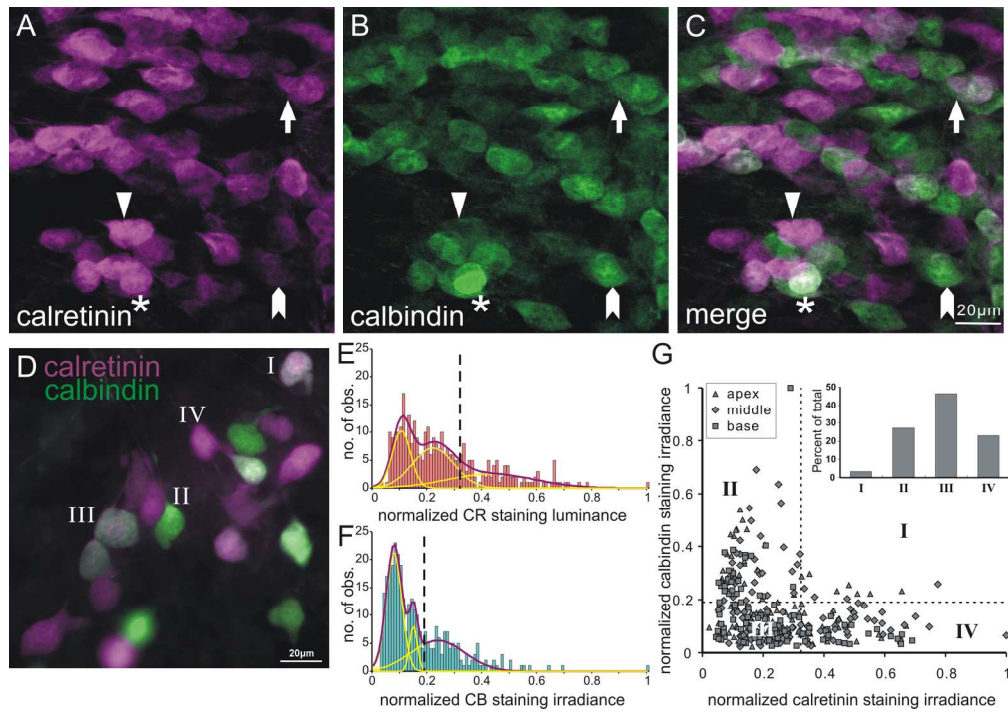

Supp. Fig. 3 Magenta-Green version of Figure 4
